# Supplementary material for: An efficient ratiometric fluorescent probe for tracking dynamic changes in lysosomal pH
Source: Royal Society of Chemistry journal article supplement (doi:10.1039/c5an00683j), 2015-01-01
Supplement: c5an00683j1.pdf [file c5an00683j1.pdf]

Details of the video: With addition of chloroquine(Which can change the pH in HeLa cells), the fluorescence intensity of HeLa cells in the green channel exhibited time-dependent decrease while that in the blue channel showed time-dependent dramatically increase, the Video showed the dynamic overlap imaging of the green and blue channels.
